# Supplementary material
Source: publisher figshare collection journal article supplement (https://gsapubs.figshare.com/ndownloader/files/22398834)
Supplement: Supplementary file 1 [file 22398834]

## Sheet: Sheet1
Supplemental Table 4. Major and trace element compositions of bulk rock samples.
Sample	SiO2	TiO2	Al2O3	Fe2O3	FeO	MnO	MgO	CaO	Na2O	K2O	P2O5	LOI	Total	Data	Cs	Rb	Sr	Zr	Y	Nb	Ba	Sc	V	Cr	Ni	Cu	Zn	Co	Ta	Hf	U	Th	Pb	La	Ce	Pr	Nd	Sm	Eu	Gd	Tb	Dy	Ho	Er	Tm	Yb	Lu	rock
														sources
	oxide abundances in weight percent														trace element abudances in parts per million
Svarthopen intrusion
N57.99A	57.09	1.8	17.54	9.72	n.d.	0.15	3.27	5.26	2.93	2.09	0.2	0.38	100.42	1	n.d.	88	275	336	40	n.d.	625	n.d.	144	96	11	14	113	31	n.d.	n.d.	n.d.	27	14	n.d.	n.d.	n.d.	n.d.	n.d.	n.d.	n.d.	n.d.	n.d.	n.d.	n.d.	n.d.	n.d.	n.d.	porphyroclastic garnet amphibole biotite tonalite
N53.99A	52.92	1.31	17.78	8.53	n.d.	0.15	5.44	9	2.51	1.54	0.12	0.91	100.2	3	2.73285	54.49	294.06	123.46	12.75	12.75	254.68	25	206	127	6	10	88	34	0.97	3.6	1.03	7.97	9.55	24.796	52.941	6.615	26.076	5.588	1.512	5.527	0.926	5.66	1.11	2.91	0.42	2.52	0.3768	protoclastic, uralitic biotite amphibole quartz diorite
N54.99	52.07	1.95	16.32	11.47	n.d.	0.18	5.46	8.17	2.77	1.47	0.27	0.35	100.47	3	1.49812	40.31	336.72	214.6	21.69	21.69	358.91	27	188	120	20	19	112	39	1.55	5.48	0.95	5.5	8.4	29.859	66.008	8.729	42.958	9.162	2.166	7.86	1.287	7.82	1.54	3.98	0.58	3.53	0.5358	uralitic biotite hornblende quartz diorite
N55.99C	60.48	0.79	18.11	5.74	n.d.	0.11	1.55	5.45	4.53	1.81	1.02	0.55	100.13	1	n.d.	77	378	343	86	n.d.	630	n.d.	43	61	d.l.	9	89	15	n.d.	n.d.	n.d.	10	20	n.d.	n.d.	n.d.	n.d.	n.d.	n.d.	n.d.	n.d.	n.d.	n.d.	n.d.	n.d.	n.d.	n.d.	garnet biotite tonalite
N55.99F	58.01	1.4	17.25	9.31	n.d.	0.11	2.63	3.92	3.27	3.19	0.42	0.54	100.05	1	n.d.	137	269	306	44	n.d.	801	n.d.	105	81	8	6	154	27	n.d.	n.d.	n.d.	16	18	n.d.	n.d.	n.d.	n.d.	n.d.	n.d.	n.d.	n.d.	n.d.	n.d.	n.d.	n.d.	n.d.	n.d.	garnet-bearing biotite tonalite
N56.99	50.45	1.95	16.34	11.74	n.d.	0.18	5.88	8.82	2.73	1.55	0.27	0.53	100.45	3	1.16391	63.64	376.84	224.69	21.56	21.56	341.48	27	192	88	21	20	114	40	1.52	5.87	0.77	4.3	8.65	30.783	67.911	8.845	36.068	7.921	2.159	7.798	1.276	7.68	1.52	3.92	0.56	3.39	0.5221	uralitic biotite amphibole quartz diorite
N58.99	50.34	1.48	17.85	10.09	n.d.	0.16	6.14	8.65	3.18	1.62	0.34	0.64	100.5	3	3.94446	68.8	582.68	227.4	10.75	10.75	437.96	27	182	41	53	34	111	37	0.64	5.53	1.4	7.39	11.53	35.813	76.107	9.509	37.724	7.046	2.053	6.577	0.995	6.04	1.21	3.15	0.46	2.73	0.4334	uralitic biotite amphibole diorite
N59.99	51.85	2.71	16.34	12.3	n.d.	0.19	4.22	8.14	3.01	1.03	0.47	0.19	100.45	3	1.31887	33.43	371.14	246.33	36.88	36.88	193.93	29	197	62	d.l.	17	121	38	2.79	6.05	0.82	3.84	13.55	37.186	83.143	11.002	45.597	9.481	2.358	8.847	1.384	8.02	1.56	4.02	0.57	3.45	0.5287	biotite amphibole quartz diorite
N132.00	54.15	1.91	17.13	10.64	n.d.	0.23	4.01	6.07	2.64	1.84	0.28	0.51	99.41	2	n.d.	n.d.	256	328	36.1	28	365	25	153	45	11	16	103	n.d.	n.d.	n.d.	n.d.	n.d.	n.d.	n.d.	n.d.	n.d.	n.d.	n.d.	n.d.	n.d.	n.d.	n.d.	n.d.	n.d.	n.d.	n.d.	n.d.	garnet-bearing amph bio tonalite
N191	70.64	0.34	15.84	2.02	n.d.	0.03	0.63	1.55	3.95	4.21	0.11	0.73	100.05	2	n.d.	192	268	159	13.96	7.28	486	3.7	13	3	d.l.	2	43	n.d.	n.d.	n.d.	n.d.	n.d.	n.d.	n.d.	n.d.	n.d.	n.d.	n.d.	n.d.	n.d.	n.d.	n.d.	n.d.	n.d.	n.d.	n.d.	n.d.	biotite granite
N192	51.63	2.04	17.61	11.36	n.d.	0.19	5.29	6.71	2.55	1.52	0.3	0.75	99.94	2	n.d.	57	286	184	23.6	21.18	301	24.3	197	84	41	18	123	n.d.	n.d.	n.d.	n.d.	n.d.	n.d.	n.d.	n.d.	n.d.	n.d.	n.d.	n.d.	n.d.	n.d.	n.d.	n.d.	n.d.	n.d.	n.d.	n.d.	uralitic quartz-bearing biotite amphibole gabbro/diorite
N193B	49.3	2.39	16.24	12.75	n.d.	0.19	5.81	8.4	2.62	1.67	0.35	0.86	100.59	2	n.d.	63	352	232	37.3	28.27	282	25.5	219	64	42	25	118	n.d.	n.d.	n.d.	n.d.	n.d.	n.d.	n.d.	n.d.	n.d.	n.d.	n.d.	n.d.	n.d.	n.d.	n.d.	n.d.	n.d.	n.d.	n.d.	n.d.	augite-bearing biotite amphibole quartz-bearing diorite
N02.05	54.78	1.85	17.55	10.52	n.d.	0.17	3.58	5.79	2.84	2.03	0.24	0.49	99.84	3	2.16981	81.35	258.14	297.03	36.23	28.75	429.54	27.2	n.d.	n.d.	n.d.	n.d.	n.d.	n.d.	2.11	7.65	0.93	14.4	20.26	51.819	106.575	12.845	54.887	10.189	2.437	8.531	1.278	7.55	1.46	3.96	0.57	3.54	0.5559	garnet biotite amphibole quartz diorite
N03.05A	70.18	0.41	14.89	2.88	n.d.	0.06	0.53	1.86	2.68	5.76	0.11	0.52	99.89	3	2.08674	108.52	149.05	219.33	32.62	13.1	851.61	8.4	n.d.	n.d.	n.d.	n.d.	n.d.	n.d.	0.92	6.18	1.62	21.92	34.85	60.321	123.545	14.742	68.461	12.856	2	8.364	1.204	6.84	1.27	3.32	0.48	2.96	0.447	garnet biotite granite
N03.05B	65.46	0.83	16.15	4.81	n.d.	0.09	1.18	3.01	3.01	4.33	0.17	0.74	99.77	3	3.1171	97.07	219.46	378.76	63.16	23.03	820.12	18.6	n.d.	n.d.	n.d.	n.d.	n.d.	n.d.	1.46	10.33	2.38	36.5	27.9	97.567	201.61	24.115	86.444	15.993	2.512	13.616	2.041	12	2.47	7.03	1.07	6.75	1.0329	melanocratic garnet biotite granite
N04.05	61.67	1.05	16.26	7.41	n.d.	0.12	1.44	3.19	3.5	3.22	0.26	0.81	98.95	3	5.06755	202.44	212.91	604.38	85.07	40.18	598.18	16.8	n.d.	n.d.	n.d.	n.d.	n.d.	n.d.	4.12	16.45	3.93	50.48	18.47	138.35	286.1	34.084	143.928	25.829	2.785	18.533	2.643	16.09	3.44	9.94	1.53	9.44	1.4355	garnet amphibole biotite tonalite
N05.05	73.6	0.17	13.37	1.6	n.d.	0.03	0.24	1.02	2.46	6.4	0.11	0.78	99.8	3	0.97609	95.21	71.85	101.31	24.12	9.58	259.1	3.5	n.d.	n.d.	n.d.	n.d.	n.d.	n.d.	0.63	3.23	1.17	10.78	31.09	25.024	52.997	6.379	26.181	5.732	0.758	5.461	0.898	5.16	0.89	2.07	0.27	1.48	0.1953	deformed, leucocratic ms bio granite
N06.05	50.53	1.96	16.38	12.08	n.d.	0.19	5.76	8.54	2.5	1.2	0.22	0.45	99.82	3	1.14696	44.75	279.5	224.94	35.99	20.33	298.15	31.6	n.d.	n.d.	n.d.	n.d.	n.d.	n.d.	1.42	5.86	0.59	3.41	9	29.081	63.248	8.275	32.967	7.176	2.127	7.737	1.254	7.58	1.47	3.9	0.56	3.4	0.5268	biotite amphibole diorite
N07.05	53.4	1.48	21.67	7.15	n.d.	0.13	2.3	7.85	4.03	1.09	0.42	0.37	99.88	3	1.57927	35.32	347.91	655.91	50.18	21.04	252.29	19	n.d.	n.d.	n.d.	n.d.	n.d.	n.d.	1.68	17.65	2.12	14.34	13.32	61.465	122.866	14.36	52.776	9.448	3.009	8.963	1.453	9.4	2.02	5.7	0.85	5.36	0.842	biotite amphibole diorite
N51.99C	64	0.83	16.55	5.33	n.d.	0.08	1.13	2.77	3.38	4.67	0.31	0.34	99.39	1	n.d.	148	221	447	60	n.d.	1108	n.d.	37	52	d.l.	4	84	12	n.d.	n.d.	n.d.	31	30	n.d.	n.d.	n.d.	n.d.	n.d.	n.d.	n.d.	n.d.	n.d.	n.d.	n.d.	n.d.	n.d.	n.d.	gneissic garnet-bearing biotite granite
N51.99F	64.48	1.06	16.84	6.71	n.d.	0.09	1.47	3.45	3.49	3.48	0.32	0.33	101.72	1	n.d.	118	237	420	39	n.d.	1109	n.d.	60	78	d.l.	4	109	18	n.d.	n.d.	n.d.	31	26	n.d.	n.d.	n.d.	n.d.	n.d.	n.d.	n.d.	n.d.	n.d.	n.d.	n.d.	n.d.	n.d.	n.d.	garnet biotite granite
N53.99B	72.87	0.31	14.24	2.41	n.d.	0.04	0.42	1.58	3	4.79	0.11	0.78	100.56	3	1.7	140.3	132	195	33.74	14.78	574	5.1	13	56	d.l.	n.d.	n.d.	5	0.88	5.64	1.54	20.71	27.52	46.434	93.439	10.657	40.931	9.658	1.54	8.085	1.296	7.01	1.21	2.88	0.39	2.22	0.3081	muscovite-bearing biotite granite
eastern garnet hybrids, Hillstadfjellet pluton
91.10A	57.6	1.89	16.13	10.53	n.d.	0.15	2.91	5.85	2.89	1.57	0.38	0.28	100.18	1	n.d.	44	285	369	30	25	1039	n.d.	106	38	18		120	25	1.8	12.45	1.18	5.74	n.d.	34.79	84.52	n.d.	39.4	7.82	3.16	n.d.	0.91	n.d.	n.d.	n.d.	n.d.	2.66	0.54	garnet biotite amphibole quartz diorite
91.10B	59.15	1.78	15.8	9.56	n.d.	0.14	3.24	5.59	2.99	1.84	0.4	0.76	101.25	1	n.d.	57	286	214	29	23	603	n.d.	121	49	20	5	108	22	n.d.	n.d.	n.d.	n.d.	n.d.	n.d.	n.d.	n.d.	n.d.	n.d.	n.d.	n.d.	n.d.	n.d.	n.d.	n.d.	n.d.	n.d.	n.d.	garnet biotite amphibole quartz diorite
N35.91A	52.83	2.13	15.61	1.1	9.02	0.16	4.89	7.5	2.55	2.53	0.36	0.42	99.1	3	3.38605	104	334.12	225.31	34.75	27.35	352.9	24.9	170	113	42	15	113	38	2.09136	5.91934	1.32643	4.8756	11.4417	30.315	65.826	8.529	35.188	8.596	2.228	8.218	1.304	7.48	1.41	3.57	0.49	2.9	0.4375	uralitic biotite amphibole quartz diorite
N35.91B	58.96	1.56	15.43	1.64	6.59	0.12	3.76	5.77	2.51	2.58	0.3	0.47	99.69	1	n.d.	110	245	100	31	20	378	n.d.	137	96	33	3	100	22	n.d.	n.d.	n.d.	n.d.	n.d.	n.d.	n.d.	n.d.	n.d.	n.d.	n.d.	n.d.	n.d.	n.d.	n.d.	n.d.	n.d.	n.d.	n.d.	uralitic biotite amphibole quartz diorite
N48.99	49.45	0.82	11.81	7.99	n.d.	0.12	10.93	8.92	1.16	5.79	1.96	1.12	100.07	1	n.d.	52	1144	222	37	n.d.	702	n.d.	111	20	d.l.	9	144	23	n.d.	n.d.	n.d.	2	12	n.d.	n.d.	n.d.	n.d.	n.d.	n.d.	n.d.	n.d.	n.d.	n.d.	n.d.	n.d.	n.d.	n.d.	uralitic biotite amphibole diorite
western aureole hybrids, Hillstadfjellet pluton
N79.99A	50.8	0.99	21.78	7.72	n.d.	0.12	2.85	9.08	4.22	1.31	0.91	0.53	100.31	1	n.d.	40	1450	121	20	n.d.	460	n.d.	75	33	4	8	95	17	n.d.	n.d.	n.d.	4	10	n.d.	n.d.	n.d.	n.d.	n.d.	n.d.	n.d.	n.d.	n.d.	n.d.	n.d.	n.d.	n.d.	n.d.	protoclastic epidote biotite amphibole quartz diorite
N79.99B	68.62	0.55	15.12	3.85	n.d.	0.06	0.79	1.68	3.3	5.48	0.21	0.45	100.11	1	n.d.	80	923	74	98	n.d.	515	n.d.	69	48	d.l.	13	106	18	n.d.	n.d.	n.d.	11	19	n.d.	n.d.	n.d.	n.d.	n.d.	n.d.	n.d.	n.d.	n.d.	n.d.	n.d.	n.d.	n.d.	n.d.	protoclastic garnet amphibole biotite quartz diorite
*1. Major and trace element analyses at Norwegian Institute of Science and Technology (XRF)
2. Major and trace element analyses at Texas Tech University (ICP-AES)
3. Major element analyses at Texas Tech Univeristy (ICP-AES); trace element analyses at Washington State Univeristy (ICP-MS; see http://www.sees.wsu.edu/Geolab/note/icpms.html)

## Sheet: Sheet2
N57.99A		porphyroclastic garnet amphibole biotite tonalite
N53.99A		protoclastic, uralitic biotite amphibole quartz diorite
N54.99		uralitic biotite hornblende quartz diorite
N55.99C		garnet biotite tonalite
N55.99F		garnet-bearing biotite tonalite
N56.99		uralitic biotite amphibole quartz diorite
N58.99		uralitic biotite amphibole diorite
N59.99		biotite amphibole quartz diorite
N132.00		garnet-bearing amph bio tonalite
N191		biotite granite
N192		uralitic quartz-bearing biotite amphibole gabbro/diorite
N193B		augite-bearing biotite amphibole quartz-bearing diorite
N02.05		garnet biotite amphibole quartz diorite
N03.05A		garnet biotite granite
N03.05B		melanocratic garnet biotite granite
N04.05		garnet amphibole biotite tonalite
N05.05		deformed, leucocratic ms bio granite
N06.05		biotite amphibole diorite
N07.05		biotite amphibole diorite
N51.99C		gneissic garnet-bearing biotite granite
N51.99F		garnet biotite granite
N53.99B		muscovite-bearing biotite granite
91.10A		garnet biotite amphibole quartz diorite
91.10B		garnet biotite amphibole quartz diorite
N35.91A		uralitic biotite amphibole quartz diorite
N35.91B		uralitic biotite amphibole quartz diorite
N48.99		uralitic biotite amphibole diorite
N79.99A		protoclastic epidote biotite amphibole quartz diorite
N79.99B		protoclastic garnet amphibole biotite quartz diorite
